# Supplementary material for: HIV Antiretroviral Medication Neuropenetrance and Neurocognitive Outcomes in HIV+ Adults: A Review of the Literature Examining the Central Nervous System Penetration Effectiveness Score
Source: Viruses. 2022 May 26;14(6):1151. doi: 10.3390/v14061151 (PMC9227894; doi:10.3390/v14061151)
Supplement: Supplementary file 1 [file viruses-14-01151-s001.zip › viruses-1698975-supplementary.pdf]

**Table S1.** CPE 2008 and CPE 2010 scores for HIV Antiretroviral Medications.

| Medication      | CPE 2008 Score | CPE 2010 Score |
|-----------------|----------------|----------------|
| Abacavir        | 1              | 3              |
| Amprenavir      | 0.5            | N/A            |
| Amprenavir-r    | 1              | N/A            |
| Atazanavir/r    | 0.5            | 2              |
| Darunavir-r     | 0.5            | 3              |
| Delavirdine     | 1              | 3              |
| Didanosine      | 0              | 2              |
| Efavirenz       | 0.5            | 3              |
| Emtricitabine   | 0.5            | 3              |
| Enfuvirtide     | 0              | 1              |
| Etravirine      | N/A            | 2              |
| Fosamprenavir   | 0.5            | 2              |
| Fosamprenavir-r | 1              | 3              |
| Indinavir       | 0.5            | 3              |
| Indinavir-r     | 1              | 4              |
| Lamivudine      | 0.5            | 2              |
| Lopinavir-r     | 1              | 3              |
| Maraviroc       | 1              | 3              |
| Nelfinavir      | 0              | 1              |
| Nevirapine      | 1              | 4              |
| Ritonavir       | 0              | 1              |
| Raltegravir     | 0.5            | 3              |
| Saquinavir/r    | 0              | 1              |
| Stavudine       | 0.5            | 2              |
| Tenofovir       | 0              | 1              |
| Tipranavir-r    | 0              | 1              |
| Zalcitabine     | 0              | 1              |
| Zidovudine      | 1              | 4              |

**Table S2.** Summary of articles examining CPE and neurocognitive performance. See attached document.

| Article                 | <i>N</i>                              | Study Type                                            | Location                                                                         | Years       | Participant Demographics                                                                                                                                                  | HIV Duration                           | HIV characteristics                                                                                                       | ARV history                                                                                                                                 | CPE score used     | CPE analysis                                               | NP Domains and Tests                                                                                                                                                                                                                                                                                                  | Findings                                                                                                       |
|-------------------------|---------------------------------------|-------------------------------------------------------|----------------------------------------------------------------------------------|-------------|---------------------------------------------------------------------------------------------------------------------------------------------------------------------------|----------------------------------------|---------------------------------------------------------------------------------------------------------------------------|---------------------------------------------------------------------------------------------------------------------------------------------|--------------------|------------------------------------------------------------|-----------------------------------------------------------------------------------------------------------------------------------------------------------------------------------------------------------------------------------------------------------------------------------------------------------------------|----------------------------------------------------------------------------------------------------------------|
| Baker et al., 2015      | 64 HIV+ individuals                   | CS                                                    | Washington, USA (WUSTL Infectious Disease Clinic and AIDS Clinical Trials Group) | N/R         | Age: 37.96 ± 12.92, Education: 13.17 ± 2.37, Gender: 66% Male, Race/ethnicity: 76% African American, 24% White                                                            | Mean duration: 8.9 years               | Recent CD4: 539.50; Nadir CD4: 227.00; Recent plasma VL log10: 1.30                                                       | All on CART for > 3 months                                                                                                                  | CPE 2010           | Continuous and categorical (CPE ≥ 7 vs. <7)                | <b>Domains:</b> Memory, psychomotor speed, executive function, and verbal function<br><b>NP Tests:</b> Hopkins Verbal Learning Test-Revised (HVLTR), Trailmaking Test-Part A and B (TMT-A, TMT-B), and Controlled Oral Word Association Test (COWAT)-Animal Fluency.                                                  | CPE 2010 not associated with global, processing speed, verbal learning, executive functioning, verbal fluency  |
| Carvalho et al., 2016   | 417 HIV+ participants                 | CS                                                    | Ontario, Canada (Ontario HIV Treatment Cohort Study)                             | 1996-?      | Age: 46.8 ± 9.7; Education 13.9 ± 2.6; Gender: 81% male; Race: 62% white                                                                                                  | Years since diagnosis: 11.2 ± 6.4      | Current CD4 >500: 52%; Nadir CD4 <200: 62%; Plasma viral load <50: 92%                                                    | Years since first ARV treatment: 7.6 ± 5.3; Participants on 3 cART drugs for at least 90 days prior to assessment.                          | CPE 2010           | continuous and categorical (CPE 5, 6, 7, or ≥ 9)           | <b>Domains:</b> Learning/memory, processing speed, working memory, motor functioning<br>NP Tests: HVLTR, BVMT, WAIS Digit Symbol Test, WAIS Spatial Span Test, Grooved Pegboard Test                                                                                                                                  | Higher CPE 2010 associated with better global NP                                                               |
| Casado et al., 2014     | 229 HIV+ individuals                  | CS                                                    | Madrid, Spain                                                                    | 2011 - 2012 | Age: 44.6 (IQR 38-51); Gender: 77% male; Race/ethnicity: 86% white, 1% African American, 13% Hispanic; Education: 28% college; 29% high school, 43% less than high school | Median Duration: 12.18 months          | Recent CD4: 325 (210-509), Nadir CD4: 213 (100-311), plasma VL log10: 4.2 (1.7-5.1); plasma VL <50: 32%                   | Time on current ARV: 33 months (14-49); Time on any ARV: 138.1 (39.1-187)                                                                   | CPE 2010           | Categorical (CPE ≥ 7 vs. <7)                               | <b>Domains:</b> only Global<br><b>NP Tests:</b> TMT-A, TMT-B, Digit Symbol Test, and Grooved Pegboard                                                                                                                                                                                                                 | Higher CPE 2010 associated with better global NP (trend only)                                                  |
| Ciccarelli et al., 2013 | 101 HIV+ individuals, 30 HIV-controls | CS                                                    | Rome and Siena, Italy                                                            | 2008 - 2010 | Age: 47 (IQR 42-52), Gender: 65% male Education: 13 (IQR 8-13)                                                                                                            | Median duration: 11.8 years (7.2-16.9) | Current CD4: 620 (454-827), Nadir CD4: 171 (62-264)                                                                       | Time on current ARV > 12 months: 74%; Time on any ARV: 9.6 years (5.1-11.8)                                                                 | CPE 2008, CPE 2010 | Categorical: CPE 2008 ≥1.5 vs. < 1.5; CPE 2010 ≥ 6 vs. < 6 | <b>Domains:</b> Memory, attention, executive functioning, processing speed, language<br><b>NP Tests:</b> Rey's words, Rey-Osterrieth Complex Figure Test (RCFT), WAIS Digit Span, WAIS Spatial Span, Stroop Test, TMT-B, Drawings and Double Barrage, WAIS Digit Symbol, COWAT Letter Fluency                         | Higher CPE 2010 associated with better global (HAND), attention, memory<br><br>CPE 2008 not associated with NP |
| Cross et al., 2013      | 111 HIV+ individuals                  | Long.: baseline, 1 year follow-up                     | Cape Town, South Africa                                                          | N/R         | N/R                                                                                                                                                                       | N/R                                    | Recent CD4 count: 162.32, plasma VL <50: 100%                                                                             | Duration of ARV at least 10 months: 100%                                                                                                    | CPE 2010           | Categorical: CPE ≤7, CPE > 7                               | <b>Domains:</b> only Global<br><b>NP Tests:</b> Finger Tapping Test, Grooved Pegboard, HVLTR, Brief Visuospatial Memory Test-Revised (BVMT-R), Mental Alternation Test, WMS-III Digit Symbol Coding, TTMT-A, Color Trails, Stroop Test, Wisconsin Card Sorting Test (WCST), RCT, and COWAT-Animal and Fruit/Vegetable | CPE 2010 not associated with global NP                                                                         |
| Cysique et al., 2009    | 37 HIV+ individuals                   | Long.: 12, 24, 36, and 48 weeks after CART initiation | San Diego, California, USA (HNRC)                                                | 1996 - 2006 | Age: 39.7 ± 7.3; Education: 13.6 ± 3.2; Gender: 86.5% Male; Race/ethnicity: 73% White, 24% Hispanic, and 3% African-American                                              | N/R                                    | Nadir CD4: 106.9 ± 102.4, CD4 at baseline: 195.6 ± 161.9, Plasma HIV RNA (log10) Mean (IQR): 4.9, (4.01-5.6), CSF HIV RNA | Participants were either untreated (38%) or failing therapy (i.e., plasma HIV RNA > 5,000; 62%) and prescribed new CART regimen at baseline | CPE 2008           | Categorical (CPE ≥ 2 vs. CPE < 2)                          | <b>Domains:</b> Global only<br><b>NP Tests:</b> Grooved Pegboard, Paced Auditory Serial Addition Test (PASAT), Trailmaking Test Parts A & B, COWAT Letter Fluency                                                                                                                                                     | Higher CPE 2008 associated with better global NP                                                               |

|                       |                        |                                                                            |                                                                               |             |                                                                                                                                      |                                            |                                                                                                                                                                                                                               |                                                                                                                              |          |                                                                           |                                                                                                                                                                                                                                                                                                                                                                          |                                                                                                                                                                                                                                        |
|-----------------------|------------------------|----------------------------------------------------------------------------|-------------------------------------------------------------------------------|-------------|--------------------------------------------------------------------------------------------------------------------------------------|--------------------------------------------|-------------------------------------------------------------------------------------------------------------------------------------------------------------------------------------------------------------------------------|------------------------------------------------------------------------------------------------------------------------------|----------|---------------------------------------------------------------------------|--------------------------------------------------------------------------------------------------------------------------------------------------------------------------------------------------------------------------------------------------------------------------------------------------------------------------------------------------------------------------|----------------------------------------------------------------------------------------------------------------------------------------------------------------------------------------------------------------------------------------|
|                       |                        |                                                                            |                                                                               |             |                                                                                                                                      |                                            | (log10) Mean (IQR):<br>3.6 (2.9-4.3)                                                                                                                                                                                          |                                                                                                                              |          |                                                                           |                                                                                                                                                                                                                                                                                                                                                                          |                                                                                                                                                                                                                                        |
| Ellis et al., 2014    | 49 HIV+ individuals    | CS                                                                         | California (San Diego, San Francisco), Maryland, Missouri, New York, USA      | 2007 - 2012 | Age: 44.9 ± 10.08, Education: 12.24 ± 2.17, Gender: 80% Male; Race/ethnicity: 39% White, 51% Black, 8% Hispanic 2% Other             | N/R                                        | Current CD4 = 242, Nadir CD4 =175<br><br><b>CNS Targeted (n= 26):</b> Plasma VL = 4.2 (IQR 1.7-5.9), CSF HIV RNA = 3.1 (IQR 1.7-4.6)<br><b>non-CNS Targeted (n= 23):</b> Plasma VL = 3.5 (1.7-6.2), CSF HIV RNA = 3.1 (1.7-5) | Prior ARV treatment = 69% (Participants were either untreated or changing regimen)                                           | CPE 2008 | Categorical                                                               | <b>Domains:</b> Executive Functioning, Processing Speed, Verbal Fluency, Learning/Memory, Attention/Working Memory, Motor.<br><b>NP Tests:</b> Wisconsin Card Sorting Test-64-item (WCST-64), TMT-A, TMT-B, DKEFS Color-Word Test, WAIS-III Digit Symbol and Symbol Search, COWAT-Animals, Action Fluency, HVLt-R, BVMT-R, WMS-III-Spatial Span, PASAT, Grooved Pegboard | Higher CPE 2008 associated with better global (trend only)                                                                                                                                                                             |
| Fabbiani et al., 2015 | 215 HIV+ individuals   | CS                                                                         | Rome and Galatina, Italy                                                      | 2009 - 2013 | Age: 44 (38-50), Education: 13 (8-13), Gender: 77% Male; Race/ethnicity: 9% non-Italian born                                         | Median duration: 9.9 years (IQR 3.5 -16.3) | Current CD4 = 545 (IQR 398–697), Nadir CD4 = 211 (IQR 87–296), plasma VL <50 = 88%                                                                                                                                            | Time on current ARV regimen: 16 months (IQR 7–34)                                                                            | CPE 2010 | Continuous; composite score accounting for viral resistance also computed | <b>Domains:</b> global, memory, attention, processing speed, motor functioning, language<br><b>NP Tests:</b> Rey's words, WAIS Digit Span, WAIS Digit Symbol, Grooved Pegboard, Letter Fluency                                                                                                                                                                           | Higher CPE 2010 associated with better global, only after accounting for resistance<br><br>Higher CPE 2010 associated with better memory, motor (trend only)<br><br>CPE 2010 not associated with attention, processing speed, language |
| Force et al., 2021    | 31 HIV+ individuals    | Long.: baseline, 48 and 96 weeks                                           | France                                                                        | N/R         | Age: 54 (47–58), Education: 11 (9–14), Gender: 84% Male; Race/ethnicity: N/R                                                         | Median duration: 19 years (8–24)           | Current CD4 = 619 (IQR 396–761); Nadir CD4 = 165 (55–281), plasma VL < 5 = 52%, CSF VL < 5 = 71%                                                                                                                              | Currently on CART = 100%; Duration of current regimen = 3 years (IQR 2–5); Duration on any ARV regimen = 14 years (IQR 6–17) | CPE 2010 | Categorical; score accounted for viral resistance                         | <b>Domains:</b> global only<br><b>NP Tests:</b> Grooved Pegboard; GREFEX Verbal Fluency; CVLT; WAIS-III Digit Span; modified PASAT-60 items; WAIS-III Digit Symbol; TMT A&B; WCST                                                                                                                                                                                        | Higher CPE associated with better NP (HAND; GDS)                                                                                                                                                                                       |
| Heaton et al., 2010   | 1,555 HIV+ individuals | CS                                                                         | Maryland, New York, California, Texas, Washington, Missouri (CHARTER studies) | 2003 - 2007 | Age = 43.2 ± 8.5, Education = 12.5 ± 2.5, Gender: 23% Female, Race/ethnicity = 39% White, 49% African American, 9% Hispanic 3% Other | N/R                                        | Current CD4 = 420 (IQR = 262-603), Nadir CD4 = 174 (IQR = 49-300), Detectable plasma VL = 59%, Detectable CSF VL = 34%                                                                                                        | Currently on CART = 71% Duration of current regimen = 11 months (IQR = 4-27)                                                 | CPE 2008 | Continuous                                                                | <b>Domains:</b> global only<br><b>NP Tests:</b> Digit Symbol-Coding, TMT-A & B, WMS Logical Memory, RAVLT, BVMT-R, Boston Naming Test, COWAT-Letter and Semantic Fluency, WAIS Bock Design                                                                                                                                                                               | CPE 2008 not associated with global NP                                                                                                                                                                                                 |
| Heaton et al., 2015   | 436 HIV+ individuals   | Long.: visits every 6 months, 4–7 study visits (16–72 months of follow-up, | Maryland, New York, California, Texas, Washington, Missouri (CHARTER studies) | 2003 - 2007 | Age = 43.9 ± 8.4, Education = 12.9 ± 2.5, Gender = 80% Male, Race/Race/ethnicity = 43% White, 44% Black, 11% Hispanic, 2% Other      | N/R                                        | Current CD4 count = 459 (IQR 289-644), Nadir CD4 = 184 (IQR 49-320), Undetectable plasma VL plasma = 41% (58% if on ART),                                                                                                     | Currently on CART: 70%; Duration of current regimen =18.0 months ± 21.2                                                      | CPE 2008 | Continuous                                                                | <b>Domains:</b> global only<br><b>NP Tests:</b> Digit Symbol-Coding, TMT-A & B, WMS Logical Memory, RAVLT, BVMT-R, Boston Naming Test, COWAT-Letter and Semantic Fluency, WAIS Bock Design                                                                                                                                                                               | CPE 2008 not associated with global NP                                                                                                                                                                                                 |

|                        |                                                          |                                                                   |                                                  |             |                                                                                                                                                                                                           |                                             |                                                                                                                                                   |                                                                                                                           |                       |                                                            |                                                                                                                                                                                                                                                                                                                                    |                                                                                                     |
|------------------------|----------------------------------------------------------|-------------------------------------------------------------------|--------------------------------------------------|-------------|-----------------------------------------------------------------------------------------------------------------------------------------------------------------------------------------------------------|---------------------------------------------|---------------------------------------------------------------------------------------------------------------------------------------------------|---------------------------------------------------------------------------------------------------------------------------|-----------------------|------------------------------------------------------------|------------------------------------------------------------------------------------------------------------------------------------------------------------------------------------------------------------------------------------------------------------------------------------------------------------------------------------|-----------------------------------------------------------------------------------------------------|
|                        |                                                          | mean: 35 months)                                                  |                                                  |             |                                                                                                                                                                                                           |                                             | Undetectable HIV in CSF 66% (85% if on ART)                                                                                                       |                                                                                                                           |                       |                                                            |                                                                                                                                                                                                                                                                                                                                    |                                                                                                     |
| Kahouadji et al., 2013 | 54 HIV+ individuals                                      | CS                                                                | Paris, France                                    | 2003 - 2006 | Age = 41.7 ± 11.1, Gender = 35% Female, Education = 10.1 ± 3.7; Race/ethnicity not reported (all participants resided in France)                                                                          | Mean duration: 7.3 years ± 11.4             | Current CD4 count = 460.4 ± 192.9                                                                                                                 | Patients continued to receive their ARV treatment for 3 years or switched once to a new treatment with the same CPE score | CPE 2008              | Continuous; Categorical by tertile (CPE ≤1; 1 - 2.5; ≥2.5) | <b>Domains:</b> executive function, memory<br><b>NP Tests:</b> Frontal Assessment Battery (FAB), Clock Drawing Test, 5 Words Test, and Praxis Ability Scale                                                                                                                                                                        | Higher CPE 2008 associated with worse executive function<br><br>CPE 2008 not associated with memory |
| Keutmann et al., 2017  | 128 HIV+ individuals and 152 HIV- individuals            | CS                                                                | Chicago, Illinois, USA                           | N/R         | Age: 47.43 years ± 7.84; Education: 12.19 ± 2.02; Gender: 59% male, 41% female; Race/ethnicity: 88% African American                                                                                      | N/R                                         | Reported by subgroup, not reported for entire sample                                                                                              | N/R                                                                                                                       | CPE 2008              | continuous                                                 | <b>Domain:</b> Learning/Memory<br><b>NP Tests:</b> BVMT-R                                                                                                                                                                                                                                                                          | Higher 2010 CPE scores associated with better memory                                                |
| Lawler et al., 2011    | 140 (60 HIV+ individuals, 80 HIV- demo-matched controls) | CS                                                                | Gaborone, Botswana                               | 2009 - 2009 | Age = 37.5 ± 6.2, Education = 8.6 ± 4.2, Gender = 48.3% Male; Race/ethnicity not report (all participants resided in Botswana)                                                                            | Mean duration: 4.6 years ± 2.5              | Current CD4 count = 416.4 ± 198.5, Nadir CD4 = 97.6 ± 49.9, Viral Load < 400 = 93.3%                                                              | CART treatment duration = 4.1 years ± 2.1, On >3 ARV medications = 100%;                                                  | CPE 2008              | Continuous                                                 | <b>Domains:</b> Processing speed, verbal learning/memory, executive function, language/verbal fluency, and motor function<br><b>NP Tests:</b> WAIS-III Digit Symbol Coding; Verbal Fluency for Action; Botswana Auditory Verbal Learning Test (BAVLT); TMT-A; Color Trails 2; Grooved Pegboard                                     | CPE 2008 not associated with processing speed, memory, executive function, motor, verbal fuency     |
| Marra et al., 2009     | 79 HIV+ individuals                                      | Long.: baseline, 24, and 52 weeks after initiating CART           | Multiple sites through ACTG (no further details) | N/R         | Age = 39 (IQR 33-45), Education = 13 (IQR 12-15), Gender = 17% Female; Race/ethnicity = 51% Non-white                                                                                                     | N/R                                         | Current CD4 = 111 (IQR 49-224), Plasma HIV VL og10 = 4.86 (IQR 4.55-5.30), CSF VL log10 = 3.33 (IQR 2.50-3.85)                                    | All participants initiating a new cART regimen or changing existing regimen; all on ≥ 3 ARVs                              | CPE 2008              | Categorical (CPE ≥ 2 or < 2)                               | <b>Domains:</b> Global only<br><b>"Short battery"</b> NP Tests: Timed Gait, Grooved Pegboard, WAIS Digit Symbol, Finger Tapping<br><b>"Long battery"</b> NP Tests: Timed Gait, Grooved Pegboard, WAIS Digit Symbol, Finger Tapping, RAVLT, TMT, Finger Tapping, Basic Choice Reaction Time (CalCAP), and Sequential Reaction Time. | Higher CPE 2008 associated with <u>worse</u> global NP                                              |
| Sanford et al., 2018   | 79 (48 HIV+ individuals, 31 HIV- controls)               | Long.: baseline, approximately 2 years follow-up                  | St. Louis, Missouri, USA                         | 2011 - 2016 | Age = 47.7 ± 13.2, Educational = 13.3 ± 3.4, Gender = 52% Male, Race/Race/ethnicity = 31% White, 69% African-American                                                                                     | Median duration (IQR) = 13.5 years (5.2-20) | Nadir CD4 count = 190 (IQR 57-300), Current CD4 count = 630 (IQR 486, 881), plasma HIV VL <50 = 100% of sample                                    | N/R                                                                                                                       | CPE 2008              | Continuous                                                 | <b>NP Tests:</b> TMT, Digit Symbol Substitution Task (DSST), WAIS Letter-Number Sequencing, COWAT Letter Fluency, Action Fluency, HVLt-R                                                                                                                                                                                           | CPE 2008 not associated with attention, processing speed, memory, executive function                |
| Shikuma et al., 2012   | 139 HIV positive individuals                             | CS (CPE analyses) and Long.: 1 year, 2 year, and 3 year follow-up | Hawaii, USA (Hawaii Aging with HIV Cohort)       | 2001 - 2006 | Age: Younger group = 37.3 (IQR 33.4-39.3), Older group = 53.7 (IQR 51.1-57.9); Education = 12 (12-16), Gender = 85%, Male, 15% Female, Race/ethnicity = 61% White, 28% Asian/Pacific Islanders, 11% Other | Median duration (IQR): 9.6 years (5.1-15)   | Nadir CD4: 150 (50-300) Current CD4: 510.0 (318.0-647.0) Log HIV RNA <50 copies/ml: 66.19, Log HIV RNA in those with >50 copies/ml: 3.6 (2.6-4.7) | Duration of current ARV regimen at entry, median (IQR): 2.1 years (1.0-3.6).                                              | CPE 2008 and CPE 2010 | continuous                                                 | Domains: global only<br><b>NP Tests:</b> Timed Gait, Grooved Pegboard, Trail Making Test-Parts A and B, WAIS-R Digit Symbol, Choice and Sequential Reaction Time from CalCap.                                                                                                                                                      | CPE 2010 not associated with global NP                                                              |
| Simoni et al., 2010    | 100 HIV+ individuals                                     | CS                                                                | Lausanne and Geneva, Switzerland                 | N/R         | Age = 47.5 ± 9.55, Education = 73% completed high school, Gender = 72% Male,                                                                                                                              | Duration of HIV infection = 12.1            | Nadir CD4 = 170.6 ± 132.7, Current CD4 = 597.3 ± 262.1                                                                                            | Duration of Current ARV regimen: 2.5 years ± 2.4                                                                          | CPE 2008              | Continuous                                                 | <b>Domains:</b> Global only<br><b>NP Tests:</b> Cambridge Neuropsychological Test Automated Battery (CANTAB) Reaction time, Rapid Visual Information                                                                                                                                                                               | CPE 2008 not associated with global NP                                                              |

|                         |                                            |                                                 |                                                                          |             |                                                                                                                                      |                              |                                                                                                  |                                                           |          |                                                  |                                                                                                                                                                                                                                                                                                                              |                                                                                                                                                        |
|-------------------------|--------------------------------------------|-------------------------------------------------|--------------------------------------------------------------------------|-------------|--------------------------------------------------------------------------------------------------------------------------------------|------------------------------|--------------------------------------------------------------------------------------------------|-----------------------------------------------------------|----------|--------------------------------------------------|------------------------------------------------------------------------------------------------------------------------------------------------------------------------------------------------------------------------------------------------------------------------------------------------------------------------------|--------------------------------------------------------------------------------------------------------------------------------------------------------|
|                         |                                            |                                                 |                                                                          |             | Race/ethnicity = 70% White                                                                                                           | years ± 6.5                  |                                                                                                  |                                                           |          |                                                  | Processing, and Spatial Working Memory subtests, TMT                                                                                                                                                                                                                                                                         | Higher CPE 2008 associated with less severe HAND diagnosis                                                                                             |
| Smurzynski et al., 2011 | 2,636 HIV+ individuals                     | Long.: NC evaluated every 48 weeks              | 26 US States (ACTG ALLRT cohort)                                         | 1997 - 2008 | Age = 40 (IQR 34, 47), Education = 14 (IQR 12, 16) Gender = 83% Male 17% Female, Race/ethnicity = 53% White, 28% Black, 20% Hispanic | N/R                          | Current CD4 = 243.5, Nadir CD4 = 182 Current plasma VL = 43,036                                  | 69% ARV naive at baseline                                 | CPE 2008 | Continuous                                       | <b>Domain:</b> Global only<br><b>NP Tests:</b> Trail Making Test (Trail A & B) and the Wechsler Adult Intelligence Scale-Revised (WAIS-R) Digit Symbol Test.                                                                                                                                                                 | Higher CPE 2008 associated with better global NP (only with 3+ ARVs)                                                                                   |
| Tozzi et al., 2009      | 85 HIV+ individuals                        | Long.: every 3 months (30 time points)          | Rome, Italy                                                              | 1999 - 2006 | Age = 39.3 ± 8.3, Education = 11.4 ± 3.6, Gender = 74% Male                                                                          | Duration: 65.8 months ± 59.0 | Nadir CD4 = 181.6 ± 174.8, Current CD4 = 292.9 ± 291.3, Plasma LV log10 = 4.14 ± 1.29            | 95% ARV naive at baseline; prescribed 3-drug CART regimen | CPE 2008 | Continuous                                       | <b>Domains:</b> global, attention/concentration, processing speed, mental flexibility (EF), memory, motor function<br>15 test standardized NP battery, individual tests not reported                                                                                                                                         | Higher CPE 2008 associated with better global NP, attention, processing speed, executive functioning, motor<br><br>CPE 2008 not associated with memory |
| Vassallo et al., 2014   | 96 HIV+ individuals                        | Long.: Baseline, approximately 2-year follow-up | Nice, Italy                                                              | 2007 - 2011 | Age = 48 ± 11, Gender = 80% Male                                                                                                     | Duration: 12 years ± 7.5     | Nadir CD4 = 265 ± 182, Current CD4 = 551 ± 272, plasma VL = 10,760 ± 34,828, plasma VL <40 = 58% | Duration on current ARV regimen = 24.6 months ± 20.5      | CPE 2010 | Continuous                                       | <b>Domains:</b> Global only<br><b>NP Tests:</b> Grober and Buschke test, ‘Four seconds’ test, Paced Auditory Serial Addition Task (PASAT), Stroop test, Modified Card Sorting test, Finger tapping, Timed alternating hand sequence test), Verbal Fluency, and Protocole Montral-Toulouse d'Evaluation des Gnosies Visuelles | Higher CPE 2010 associated with better global NP (HAND)                                                                                                |
| Wilson et al., 2013     | 118 HIV+ individuals, 310 HIV– individuals | CS                                              | Chicago, Illinois, USA                                                   | N/R         | Age: 43.45 years ± 6.57; Education: 11.63 ± 2.07; Gender: 64% Male, 36% Female; Race/ethnicity: 88% African American                 |                              | Undetectable viral load: 64% of sample                                                           | N/R                                                       | CPE 2010 | continuous and categorical (CPE ≤ 7 vs. CPE > 7) | <b>Domain:</b> Learning (Procedural)<br><b>NP Tests:</b> Rotary Pursuit Task; Weather Prediction Task                                                                                                                                                                                                                        | CPE 2010 not associated with learning/memory                                                                                                           |
| Wright et al., 2010     | 292 HIV+ individuals                       | CS                                              | 47 sites in Australia, North America, Brazil, and Thailand (SMART study) | 2005 - 2006 | Age = 40 (IQR 35-45.5), Education = 54% less than 12 years, Gender = 42% Female, Race/ethnicity = 51% Asian, 20% Black, 30% Other    | N/R                          | Nadir CD4 = 225 (IQR 158-296), Current CD4 count = 536 (IQR 437-693), plasma VL < 400 = 88%      | Duration on any ARV regimen = 4 years (IQR 3–6)           | CPE 2008 | Continuous                                       | <b>Domain:</b> “Global” (based only on motor and processing speed)<br><b>NP Tests:</b> Grooved Pegboard, Finger Tapping, Color Trails, Timed Gait                                                                                                                                                                            | CPE 2010 not associated with “global” NP (motor, processing speed)                                                                                     |

Note: N/R = not reported; CS = Cross-sectional; Long. = Long.
